# Supplementary material
Source: Springer Nature journal article supplement (https://www.springermedizin.de/resource/supplementary/12887_2013_977_MOESM3_ESM.pdf/9476828)

Pic

CO

li

Più

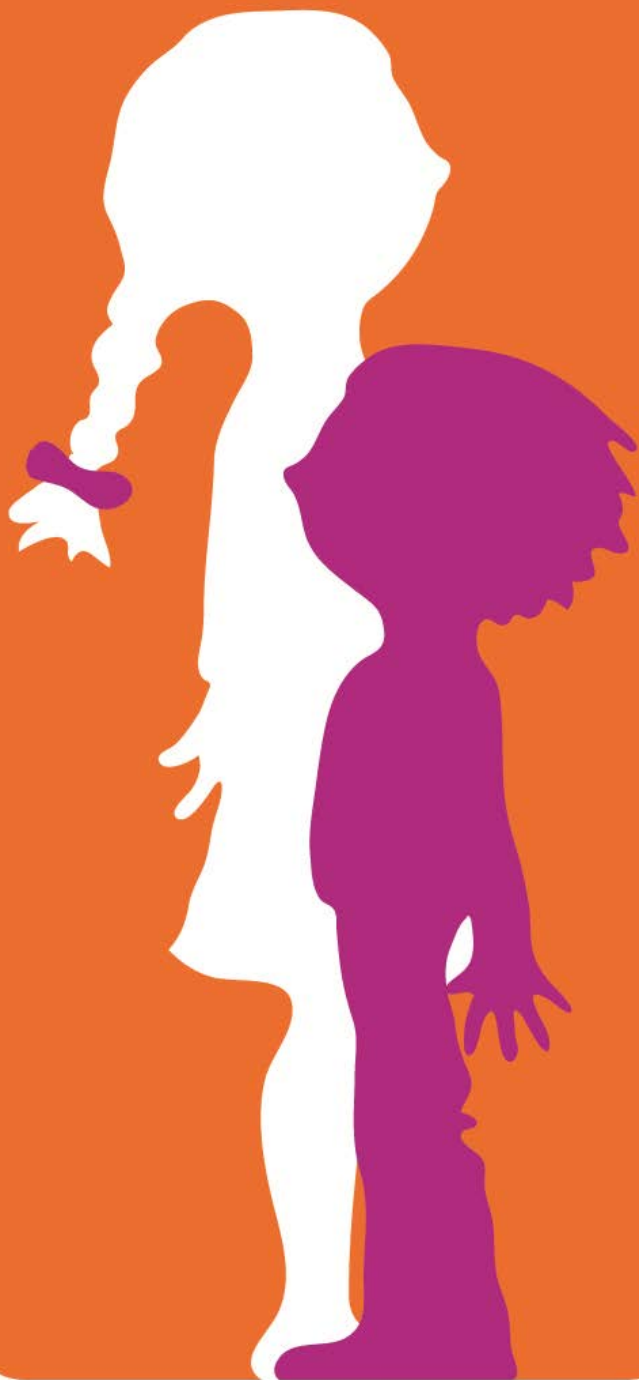

Supplement: MOESM3 [file 9476828]
